# Supplementary material for: Sustainable Plant Growth Promotion and Chemical Composition of Pyroligneous Acid When Applied with Biochar as a Soil Amendment
Source: MDPI journal article supplement (doi:10.3390/molecules27113397), 2022-05-25
Supplement: s1 [file s1]

## Supplementary material

**Supplementary material Table S1:** Randomized complete block design of pot experiment with three replicates across Block A (blue), Block B (Yellow), and Block C (Green). 100CF: 100% chemical fertilizer application; 75CF: 75% chemical fertilizer application; 50CF: 50% chemical fertilizer application; B: Biochar application; 800PA: Pyroligneous acid (800-fold dilution) application; 200PA: Pyroligneous acid (200-fold dilution) application.

|                      |                         |                    |                           |                       |                           |                         |                       |                 |                 |                    |                       |                       |                         |                           |                    |                    |                           |
|----------------------|-------------------------|--------------------|---------------------------|-----------------------|---------------------------|-------------------------|-----------------------|-----------------|-----------------|--------------------|-----------------------|-----------------------|-------------------------|---------------------------|--------------------|--------------------|---------------------------|
| 100C<br>F            | Cont<br>rol             | 200P<br>A-<br>50CF | 800P<br>A-<br>75CF        | 200PA<br>-75CF        | 200P<br>A-<br>50CF        | 200P<br>A               | 800PA<br>-50CF        | 100C<br>F       | 800PA-<br>100CF | 50CF               | 200<br>PA             | Refere<br>nce<br>Soil | B-<br>75CF              | 200P<br>A-<br>100C<br>F   | 800P<br>A-<br>50CF | B                  | 75CF                      |
| B                    | 200P<br>A-<br>100C<br>F | 200P<br>A-<br>75CF | 200P<br>A                 | 800PA<br>-100CF       | 800P<br>A                 | 200P<br>A-<br>100C<br>F | 200PA<br>-75CF        | Cont<br>rol     | 800PA7<br>5CF   | 800P<br>A          | PA-<br>B-<br>75C<br>F | 200PA<br>-75CF        | 200P<br>A-<br>50CF      | 800P<br>A-B-<br>100C<br>F | PA-<br>B-<br>75CF  | 800P<br>A          | 200P<br>A-B-<br>100C<br>F |
| B-<br>75CF           | 800P<br>A-<br>50CF      | 75CF               | 800P<br>A-<br>50CF        | Refere<br>nce<br>Soil | 200P<br>A-B-<br>100C<br>F | 800P<br>A               | Refere<br>nce<br>Soil | 75CF            | 800PA-<br>100CF | 800P<br>A-<br>50CF | B                     | 200PA<br>-50CF        | 800P<br>A-<br>100C<br>F | Cont<br>rol               | 200P<br>A          | 200P<br>A-<br>75CF | 800P<br>A-B               |
| 800P<br>A-B-<br>75CF | 50CF                    | 800P<br>A          | 800P<br>A-B-<br>100C<br>F | B-<br>100CF           | 200P<br>A                 | 200P<br>A-<br>100C<br>F | 200PA<br>-75CF        | B-<br>100C<br>F | 200PA-<br>50CF  | 200P<br>A-<br>50CF | B-<br>75C<br>F        | 200PA                 | B-<br>100C<br>F         | 800P<br>A-<br>50CF        | 100C<br>F          | 800P<br>A-<br>75CF | 50CF                      |

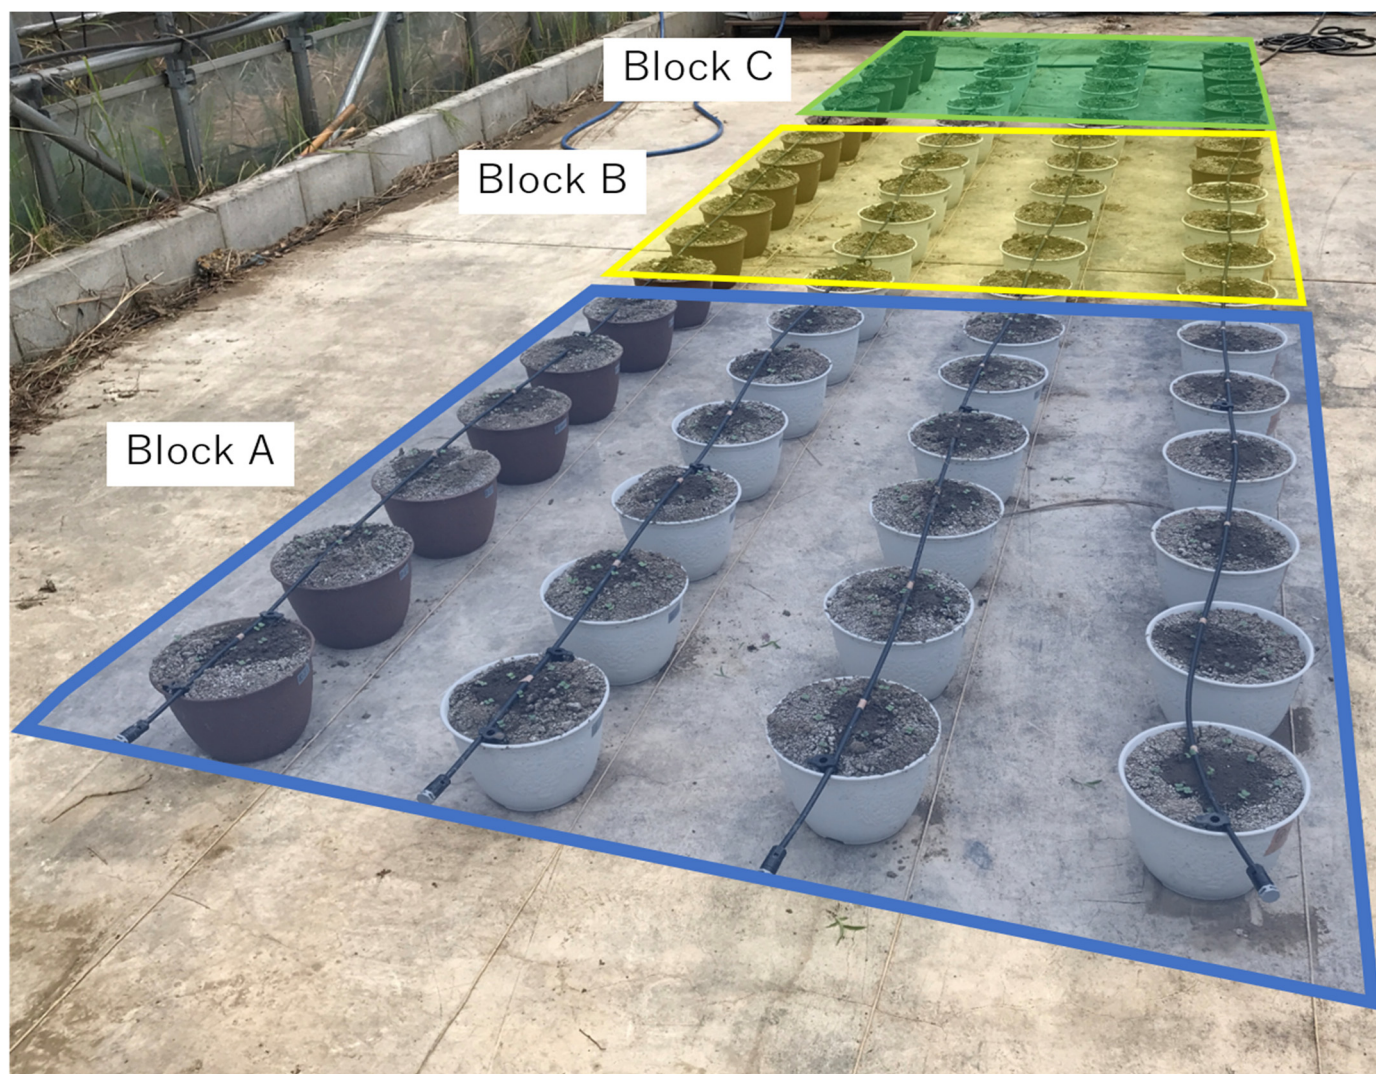

**Supplementary material Figure S1:** Picture of randomized complete block design pot experiment.
